1 Coronin-1 is necessary for enteric pathogen-induced transcytosis across human ileal enteroid  
2 monolayers expressing M cells

3  
4 Janet F. Staab<sup>1\*</sup>, Michele Doucet<sup>1\*</sup>, Rachel Latanich<sup>1</sup>, Sun Lee<sup>1</sup>, Mary K. Estes<sup>2</sup>, James B.  
5 Kaper<sup>3</sup>, Nicholas C. Zachos<sup>1</sup>

6  
7 <sup>1</sup> Department of Medicine, Division of Gastroenterology and Hepatology, Johns Hopkins  
8 University School of Medicine, Baltimore, MD

9  
10 <sup>2</sup> Department of Molecular Virology and Microbiology, Baylor College of Medicine, Houston, TX

11  
12 <sup>3</sup> Department of Microbiology and Immunology, University of Maryland School of Medicine,  
13 Baltimore, MD

14  
15  
16 \* These authors contributed equally

17  
18 To whom correspondence should be addressed:  
19 Nicholas C. Zachos, 720 Rutland Avenue, 943 Ross Research Building, Baltimore, MD 21205.  
20 (p) 410-614-0128; (f) 410-955-9677; nzachos1@jhmi.edu

21  
22  
23

24

25

26

27

28

29

30

31

32

33

34

35

36

37

38 **ABSTRACT**

39 In the intestine, luminal sampling by microfold (M) cells is crucial for inducing protective  
40 mucosal immune responses but can also serve as an entry pathway for pathogens, including  
41 bacteria and viruses. Enteric pathogens can influence intestinal M cell function; however, the  
42 molecular mechanisms involved in the regulation of uptake and transcytosis of gut cargo by  
43 human M cells remain to be determined. Understanding the mechanisms responsible for  
44 regulating human M cell function requires a relevant human model. In this study, human ileal  
45 enteroids established from healthy donors were grown as confluent monolayers on permeable  
46 supports and differentiated to express mature M cells. Enteric pathogens including  
47 enteropathogenic *E. coli* (EPEC), adherent invasive *E. coli* (AIEC), and human rotavirus were  
48 apically exposed to M cell enteroid monolayers. M cell-mediated uptake and transcytosis was  
49 compared in enteroids infected by pathogenic or commensal bacteria (HS strain). EPEC and  
50 AIEC, but not HS, stimulated M cell uptake and transcytosis. We discovered that this pathogen-  
51 specific effect was dependent on expression of coronin 1a, a cytoskeletal remodeling protein.  
52 Using stable coronin 1a knockdown (KD) enteroids, we observed that EPEC-stimulated  
53 transcytosis of fluorescent beads was lost and associated with a significant decrease in the  
54 number of glycoprotein-2 positive (Gp-2<sup>+ve</sup>) M cells. The results of these studies demonstrate  
55 that coronin 1a is required for uptake and transcytosis of luminal cargo across human M cells  
56 and that coronin 1a is necessary for differentiation of mature M cells that actively transcytose  
57 luminal gut antigens in response to pathogenic, but not commensal, microbes.

58

59

60

61

62

63

## 64 INTRODUCTION

65 The most prominent feature of the follicle associated epithelium (FAE) is the presence of  
66 microfold (M) cells, which specialize in surveying the gut luminal environment by sampling and  
67 delivering luminal contents to immune cells as a part of normal intestinal homeostasis <sup>1</sup>. Luminal  
68 sampling by M cells is crucial for inducing protective mucosal immune responses but can also  
69 serve as the entry pathway for pathogens, including bacteria and viruses <sup>2</sup>. Enteric pathogens  
70 can influence the induction and/or function of intestinal M cells; however, the molecular  
71 mechanisms involved in the regulation of uptake and transcytosis of gut cargo by human M cells  
72 remains incomplete <sup>3</sup>. Although phagocytosis has been implicated as the entry pathway for  
73 luminal gut cargo into M cells, detailed mechanistic studies to determine the regulation of this  
74 pathway are also lacking. Following uptake, M cells move luminal antigens across the  
75 epithelium without being degraded, presumably since M cells have very few lysosomes <sup>4</sup>. The  
76 capacity of M cells to move cargo across the epithelium provides a route by which enteric  
77 pathogens can invade the intestinal mucosa. While numerous studies in animal models and cell  
78 lines have established that M cells are required for pathogen invasion of the Peyer's patch, the  
79 mechanism responsible for trafficking gut cargo across human M cells has not been identified.

80 M cells are differentiated from actively dividing intestinal stem cells and their abundance in  
81 the FAE is affected by the presence and composition of intestinal microbiota as well as the  
82 presence of stromal and immune cells in the sub-epithelial dome of the Peyer's patch.  
83 Compared to conventional mice, germ-free mice express very few M cells, yet exposure to a  
84 single enteric pathogen, such as Salmonella, can significantly increase M cell abundance, which  
85 occurs over many days <sup>5-6</sup>. Chronic gastrointestinal disorders such as ileal Crohn's disease,  
86 which has a dysregulated microbiome as a component of disease, have increased numbers of  
87 M cells in the Peyer's patch <sup>7</sup>. Additionally, short term exposure of the Peyer's patch to  
88 pathogens increases the rate of M cell uptake of luminal antigens in the without altering M cell  
89 abundance <sup>8</sup>. These findings, among others, support the hypothesis that the M cell abundance

90 and function are influenced by interactions with commensal or pathogenic organisms<sup>9-10</sup>.  
91 Considering the evidence that a relationship exists between the intestinal microbiome and  
92 mucosal immune responses, there is a need to identify the mechanisms responsible for how  
93 human M cells function in response to luminal challenges.

94 Understanding the factors that regulate human M cell expression and function requires a  
95 relevant human model. Previous studies have established protocols to differentiate human  
96 intestinal stem cell-derived enteroids (HIEs) to express functionally mature M cells. Recent  
97 reports by us, and others, demonstrate that M cell expressing HIEs can transcytose enteric  
98 pathogens, including *Shigella* and rotavirus<sup>11,12</sup>. However, our understanding of the  
99 mechanisms that regulate these processes in humans is incomplete. In the current study, we  
100 present a unique regulatory role for coronin 1a, a cytoskeletal remodeling protein not previously  
101 studied in the human intestinal epithelium, in the uptake and transcytosis of luminal cargo by  
102 human M cells.

103

## 104 **METHODS**

### 105 **Antibodies/Reagents**

106 Human recombinant TNF- $\alpha$  and RANK-L were from PeproTech. Mouse monoclonal  
107 antibody to glycoprotein-2 (Gp-2) was from MBL (Clone: 3G7-H9; Cat# D277-3). Mouse  
108 monoclonal antibodies to coronin 1a (Cat #: Ab56820) and  $\beta$ -actin (Cat #: 8224) were from  
109 Abcam. Rabbit polyclonal antibody to coronin 1a was from Abcam (HPA051132). Rabbit  
110 monoclonal antibody to CCL3 was from Abcam (Cat #: 170958). Fluorescent polystyrene latex  
111 beads (535/575 0.02-2.0 $\mu$ m), AlexaFluor 633-conjugated phalloidin, and Hoescht 33342 were  
112 from Life Technologies. Mouse monoclonal antibody to GAPDH was from Sigma (Cat #:  
113 G8795).

114

### 115 **Study approval**

116 De-identified intestinal tissue was obtained from healthy subjects provided informed  
117 consent at Johns Hopkins University and all methods were carried out in accordance with  
118 approved guidelines and regulations. All experimental protocols were approved by the Johns  
119 Hopkins University Institutional Review Board (IRB# NA\_00038329).

120

## 121 **Human Small Intestinal Enteroids (HIEs)**

122 Human duodenal (n=1), jejunal (n=1), and ileal (n=4) enteroids were generated from  
123 biopsies obtained after endoscopic procedures utilizing the protocol established by the Clevers  
124 laboratory<sup>13</sup>. Enteroids were maintained as cysts embedded in Matrigel (Corning, USA) in non-  
125 differentiation media (NDM) containing Wnt3a, R-spondin-1, noggin and EGF, as we have  
126 described<sup>14</sup>. Enteroid monolayers (HEM) were generated as previously described in detail<sup>14-15</sup>.  
127 Monolayer differentiation was induced by incubation in Wnt3A-free and Rspo-1-free  
128 differentiation media (DFM) for five days<sup>14</sup>. M cell differentiation was accomplished in enteroid  
129 monolayers exposed basolaterally to DFM that included RANKL (100ng/ml) and TNF- $\alpha$   
130 (50ng/ml) for 5 days (referred to as MCM)<sup>16</sup>. Monolayer confluency and differentiation were  
131 monitored by measuring transepithelial electrical resistance (TEER) with an ohmmeter (EVOM<sup>2</sup>;  
132 World Precision Instruments, USA), as previously described<sup>14</sup>.

133

## 134 **shRNA Lentivirus Transduction**

135 Human ileal enteroids were transduced with GIPZ lentiviral shRNA kit for human Coronin 1a  
136 (GE Healthcare Dharmacon) based on protocol adapted from Heijmans et al.<sup>17</sup>. Coronin 1a  
137 shRNA 1 (V3LHS\_412912: 5'-TAGTTTCTATATACAAGCA-3'), Coronin 1a shRNA 2  
138 (V3LHS\_412913: 5'-AACATGGGAAGTAACTCCT-3'), Coronin 1a shRNA 3 (V3LHS\_412914:  
139 5'-TCAACAAAAAGTACAACGT-3'). Following transduction, enteroids were maintained in NDM  
140 with 0.25 $\mu$ g/ml puromycin for stable selection of enteroids expressing each Coronin 1a shRNA

141 clone. A separate enteroid line was also generated to stably express a non-silencing shRNA  
142 (NS) to serve as a negative control.

143

#### 144 **Immunofluorescent Confocal Microscopy**

145 Immunostaining was performed as previously described <sup>14</sup>. Briefly, ileal enteroid  
146 monolayers were grown to confluency on 24-Transwells (Corning 3470) and differentiated with  
147 MCM or DFM to express or lack Gp-2<sup>+ve</sup> M cells, respectively. Monolayers were fixed in 4%  
148 paraformaldehyde (PFA) in PBS for 30 min prior to addition of blocking solution. Primary  
149 antibodies were exposed to permeabilized monolayers for 1 hour at RT and then overnight at  
150 4°C. Cells were washed three times in PBS-T (PBS with 0.1% Tween-20) and exposed to  
151 secondary antibodies in the presence of phalloidin (AlexaFluor 633 conjugated; Life  
152 Technologies) and Hoechst 33342 (nuclear counterstain; Life Technologies) for 1 hour at RT.  
153 After washing in PBS-T, filters were removed from inserts and mounted (ProLong Gold Antifade  
154 Mountant, ThermoFisher) and coverslipped. Confocal images were obtained using Olympus  
155 FluoView 3000.

156

#### 157 **M cell uptake and transcytosis**

158 M cell mediated uptake was determined by confocal microscopy of apically exposed  
159 2.0µm fluorescent polystyrene latex beads (Life Technologies; 4x10<sup>8</sup> final concentration) to  
160 human enteroid monolayers expressing or lacking M cells that were cultured in the presence or  
161 absence of 10<sup>6</sup> pathogenic bacteria overnight. Following infection, monolayers were washed,  
162 fixed, and stained for confocal microscopy. Uptake was defined as the number of internalized  
163 beads in Gp-2<sup>+ve</sup> M cells and compared to the number of beads localized to the surface of the  
164 monolayers. Additionally, fluorescence intensity of internalized beads was quantified in cell  
165 lysates obtained following the overnight infection period. Cell lysate fluorescence was measured

166 using Perkin Elmer Envision plate reader. M cell transcytosis of 0.02 $\mu$ m fluorescent beads was  
167 also quantified in basolateral media collected from treated monolayers using Perkin Elmer  
168 fluorescent plate reader.

169

## 170 **Western blot analysis**

171 Cell lysates of human ileal enteroids were obtained by harvesting in lysis buffer (60 mM  
172 HEPES pH 7.4, 150 mM KCl, 5 mM Na<sub>3</sub>EDTA, 5 mM EGTA, 1 mM Na<sub>3</sub>VO<sub>4</sub>, 50 mM NaF,  
173 1% Triton X-100) with protease inhibitor cocktail (1:100). Cells were disrupted by vigorous  
174 pipetting, flash frozen in liquid N<sub>2</sub>, and then end-over-end rotated for 2 hours at 4°C. Lysates  
175 were solubilized in sodium dodecyl sulfate gel-loading buffer with  $\beta$ -mercaptoethanol and  
176 heated at 70°C for 10 minutes. 30 $\mu$ g of total cell lysates of differentiated enteroids (with and  
177 without M cells) were separated on Tris-glycine gels and proteins transferred to nitrocellulose  
178 membranes. Protein expression was normalized to either GAPDH or  $\beta$ -actin as internal controls.  
179 Band intensity was detected and quantified using Li-Cor Odyssey Infrared Imaging System.

180

## 181 **Statistics:**

182 Data are shown as mean  $\pm$  S.E.M. Statistical comparisons were performed in Prism 8  
183 (GraphPad) using either the two-tailed Student's t test or ANOVA with Tukey's multiple-  
184 comparison post hoc test. P values less than 0.05 were considered significant. (\* $p < 0.05$ ; \*\* $p <$   
185 0.01)

186

## 187 **RESULTS**

### 188 **RANKL and TNF- $\alpha$ enhance the number of M cells in human ileal enteroid monolayers**

189 Human enteroids can be differentiated to express M cells by reducing Wnt signaling and  
190 stimulating non-canonical NF- $\kappa$ B signaling by exposing enteroids to receptor activator of NF- $\kappa$ B  
191 ligand (RANKL)<sup>11,16,18</sup>. Stimulation of canonical and non-canonical NF- $\kappa$ B signaling enhances

192 the expression of M cell associated genes in mice <sup>19</sup> and the number of mature M cells in  
193 human intestinal epithelial models which mimics their abundance *in vivo* <sup>11,16</sup>. In humans, M  
194 cells comprise ~10% of the cells in the FAE <sup>20</sup>. We differentiated (no Wnt3a, no R-spondin-1;  
195 100ng/ml RANKL, 50ng/ml TNF- $\alpha$ ) human ileal enteroid monolayers (from established enteroid  
196 lines of 4 separate healthy donors) to express M cells <sup>16</sup>. Differentiating human ileal monolayers  
197 with both TNF- $\alpha$  and RANKL induced a significantly higher number of M cells compared to  
198 RANKL or TNF- $\alpha$  alone (**Figure 1A, 1B**). This finding is supported by a recent report showing  
199 similar effects in human enteroids following exposure to RANKL, retinoic acid, and lymphotoxin,  
200 suggesting that suppression of Wnt signaling and activation of NF- $\kappa$ B signaling enhances M cell  
201 expression in human intestinal enteroids (HIEs) <sup>11</sup>. We detected the M-cell specific marker, Gp-  
202 2, at the apical membrane of human enteroid monolayers (HEMs) (**Figure 1C**) <sup>21,22</sup>. Another  
203 hallmark of human M cells is the lack of apical microvilli <sup>23,24</sup>. To confirm that our M cell HEMs  
204 exhibit this morphology, we performed scanning electron microscopy and observed cells that  
205 lacked mature, densely packed microvilli and were surrounded by other epithelial cells with  
206 abundant microvilli (**Figure 1D**). We also show that the number of M cells in HEMs is higher  
207 than in duodenal and jejunal HEMs differentiated (DF) to express M cells (**Figure 1E**), further  
208 supporting the concept that HIEs recapitulate the phenotype of the intestinal segment from  
209 which they were derived <sup>25</sup>. Since our M cell differentiation media induced expression of Gp-2<sup>+ve</sup>  
210 M cells with effaced apical membranes, we next tested whether our M cell model expresses  
211 human FAE markers <sup>26</sup>.

212

### 213 **Differentiation with RANKL and TNF- $\alpha$ induces expression of the FAE marker, CCL23**

214 The FAE is the epithelial “dome” of the Peyer’s patch that covers the underlying  
215 lymphoid follicle and expresses specific chemokines and pattern recognition receptors while  
216 lacking secretory cells and expression of digestive enzymes <sup>27,28</sup>. This pattern of protein  
217 expression and lineage differentiation are distinct from the small intestinal villus epithelium. To



218 better characterize the profile of our M cell HEMs, we determined whether M cell HEMs express  
219 known markers of the FAE and M cells <sup>2</sup> including transcription factors SOX8, Spi-B, and  
220 chemokines. For example, we validated the expression of CCL23, a chemokine expressed in  
221 the human FAE <sup>26</sup>, in M cell HEMs compared to DF enteroids, which lacked CCL23 expression  
222 (**Figure 1F**). Similar findings were recently observed in human enteroids expressing M cells by  
223 RNAseq <sup>11</sup>. In this study, we demonstrate in M cell expressing HEMs, nearly every cell, with the  
224 exception of Gp-2<sup>+ve</sup> M cells, expressed CCL23. These data demonstrate that differentiating  
225 ileal HEMs to express M cells also induces expression of non-M cell FAE markers and thus is a  
226 relevant *ex vivo* model of the human FAE.

227

## 228 **Enteric pathogens induce M cell-mediated uptake and transcytosis**

229 M cells sample luminal antigens across the follicle associated epithelium for delivery to  
230 underlying innate and adaptive immune cells; however, how this process is regulated in human  
231 M cells remains to be elucidated. We measured human M cell function (i.e. uptake and  
232 transcytosis) and compared them to DF (i.e. “villus”-like) HEMs. DF or M cell HEMs, were  
233 exposed to fluorescent polystyrene latex beads (**Figure 2A-E**), a standard assay performed in  
234 numerous published reports to measure M cell uptake and transcytosis <sup>11,18,29-31</sup>. Under basal  
235 conditions, apical entry and transcytosis of fluorescent beads (detected in the basolateral  
236 compartment of HEMs) was similar between DF and M cell monolayers (black bars; **Figure 2B**).  
237 We challenged DF and M cell HEMs to *Enteropathogenic E. coli* (EPEC), which binds the  
238 surface of human M cells <sup>32</sup>. Exposure of M cell enteroids to live EPEC (blue bars) significantly  
239 increased bead uptake and transcytosis (**Figure 2B**). Similar results were observed in M cell  
240 HEMs exposed to sonicated EPEC (yellow bars) but not lipopolysaccharide (LPS; white bars).  
241 EPEC did not induce transcytosis in DF HEMs. These findings suggest that outer membrane  
242 proteins or secreted factors from EPEC are required for luminal bead capture and transcytosis  
243 by M cells. Since our EPEC data suggest that pathogenic microbes can increase bead capture,

244 we performed similar studies with the commensal bacterial strain, HS. Apical exposure of HS  
245 did not increase bead uptake or transcytosis compared to vehicle control and EPEC infected M  
246 cell HEMs (**Figure 2C**). These results suggest that commensal bacteria do not stimulate M cell  
247 function, which instead requires factors from enteric pathogens. A similar effect was observed in  
248 M cell HEMs exposed to the invasive AIEC strain (**Figure 2D**). In this experiment, AIEC induced  
249 internalization of fluorescent beads into Gp-2<sup>+ve</sup> M cells while the beads remained in the luminal  
250 compartment in normally differentiated (DF) HEMs or in unexposed M cell HEMs (**Figure 2E**).

251 We also tested whether enteric viruses transcytose across M cell enteroids by evaluating  
252 human rotavirus (RV). Transcytosis of human RV (Ito strain <sup>33</sup>) occurred in M cell HEMs but not  
253 in DF HEMs (**Figure 2F**). These results mimic similar findings recently reported in human M cell  
254 monolayers <sup>11</sup>. Our data support the concept that luminal capture and transcytosis can be  
255 initiated by pathogenic microbes, including viruses, in human M cell enteroids.

256

### 257 **Coronin 1a is necessary for uptake of luminal cargo by human M cell expressing** 258 **enteroids**

259 We next asked what protein mediates the M cell response to enteric pathogens. Since  
260 human M cell HEMs demonstrate increased uptake and transcytosis of luminal cargo when  
261 exposed to enteric pathogens, we hypothesized that coronin 1a may regulate this process. A  
262 role for coronin 1a in pathogen induced activation of phagocytosis has been described <sup>34-36</sup>.  
263 Coronin 1a mediates phagocytic entry and protection of pathogenic, but not commensal,  
264 mycobacteria from lysosomal degradation in macrophages <sup>34</sup>; however, there have been no  
265 studies to understand the role of coronin 1a in the human intestinal epithelium. Since sampling  
266 of the luminal gut environment occurs via phagocytosis in M cells, we asked whether  
267 differentiation of human enteroid monolayers to express M cells also stimulated expression of  
268 phagocytic proteins such as coronin 1a. As shown in **Figure 3A**, coronin 1a protein expression  
269 is increased in differentiated HEMs following RANKL treatment; however, this induction was

270 greater when exposed to both RANKL and TNF- $\alpha$ . Coronin 1a expression was increased >20-  
271 fold in M cell HIEs compared to DF HIEs, which we validated by immunoblot (**Figure 3A**).  
272 Confocal microscopy showed that Gp-2<sup>+</sup> M cells co-localized with coronin 1a (**Figure 3B**).  
273 Analysis of confocal images confirmed that coronin 1a expression was highly correlated with M  
274 cells ( $r^2=0.9922$ ; **Figure 3C**) while only ~30% of coronin 1a expressing cells were also positive  
275 for Gp-2 ( $r^2=0.0981$ ; **Figure 3D**). In our M cell expressing HEMs, the number of coronin 1a  
276 expressing cells was nearly 3 times higher than Gp-2<sup>+</sup> mature M cells (**Figure 3E**). The  
277 distribution of coronin 1a included expression at the apical pole of epithelial cells which was also  
278 associated with actin filaments along the lateral membrane (**Figure 3F**) supporting its already  
279 known role as an cytoskeletal protein.

280 To demonstrate a role for coronin 1a in human M cell function, we generated a stable  
281 coronin 1a knockdown (KD) ileal enteroid line (shRNA construct 59; ~70% decreased protein  
282 expression) as well as a control HIE in which coronin 1a expression was not affected by shRNA  
283 KD constructs (NS) (**Figure 4A**). As demonstrated in **Figure 4B**, shRNA construct 59 KD of  
284 coronin 1a decreased protein expression in HEMs differentiated with RANKL and TNF- $\alpha$  to  
285 express mature M cells when compared to the NS control enteroid line. Using these lines, we  
286 investigated the role of coronin 1a in mediating pathogen-induced activation of M cell uptake  
287 and transcytosis.

288 To test the possibility that that pathogens may exploit coronin 1a to facilitate capture and  
289 passage of gut contents across the intestinal epithelium, we performed luminal bead capture  
290 studies in coronin 1a KD enteroids exposed to EPEC. Coronin 1a KD enteroids lost their ability  
291 to uptake fluorescent beads compared to control enteroid monolayers (NS) (**Figure 4C**)  
292 suggesting that coronin 1a is required for entry of non-specific cargo into human M cells. These  
293 data demonstrate that EPEC can induce capture and transcytosis of luminal content across  
294 human M cell enteroid monolayers by a coronin 1a-dependent mechanism.

295

## 296 **Coronin 1a is required for expression of Gp-2<sup>+ve</sup> M cells**

297 M cells are differentiated from Lgr5<sup>+ve</sup> intestinal stem cells (ISCs) <sup>29</sup> via RANK signaling,  
298 which is responsible for lineage differentiation of M cells <sup>37</sup>. RANKL induces the expression of M  
299 cell-specific transcription factors including SOX8 and Spi-B, which are essential for  
300 differentiation of M cells <sup>29,37-40</sup>. Mature M cells are defined by the expression of the pattern  
301 recognition receptor (PRR), glycoprotein 2 (Gp-2), at the apical membrane <sup>21,22</sup>. In addition to  
302 Gp-2, which binds FimH of *E. coli*, M cells specifically express other PRRs that bind and  
303 transport microbes across the epithelium <sup>41</sup>; however, what regulates apical PRR localization in  
304 M cells is not known. Since our results suggest that the cytoskeletal remodeling protein, coronin  
305 1a, is required for pathogen-induced stimulation of M cell function and we found a high  
306 correlation between Gp-2<sup>+ve</sup> cells and coronin 1a, we hypothesized that loss of coronin 1a  
307 affects Gp-2 expression and/or localization and could explain why EPEC is unable to induce M  
308 cell activity in the absence of coronin 1a. As shown by confocal microscopy in **Figure 5A**, KD of  
309 coronin 1a resulted in decreased abundance of Gp-2<sup>+ve</sup> M cells in HEMs. Quantification of the  
310 number of Gp-2<sup>+ve</sup> M cells in coronin 1a-KD enteroid lines was decreased by >90% when  
311 compared to non-silenced (NS) control HEMs or non-transduced HEMs that were differentiated  
312 to express M cells (**Figure 5B**). These data suggest a critical role for coronin 1a in regulating  
313 the maturation of Gp-2<sup>+ve</sup> human M cells.

314 In order to demonstrate that loss of coronin 1a results in decreased apical expression of  
315 the PRR, Gp-2, and not a loss of M cells, we determined the expression of the transcription  
316 factors SOX8 and Spi-B in coronin 1a KD HEMs. We performed quantitative PCR (qPCR) in NS  
317 and coronin 1a KD HEMs and observed no difference in the mRNA levels of either SOX8  
318 (**Figure 5C**) or Spi-B (**Figure 5D**). Since SOX8 and Spi-B are necessary for differentiation of M  
319 cells, our data suggest that the mature M cell phenotype (i.e. Gp-2<sup>+ve</sup> expression) is dependent  
320 on coronin 1a expression.

321

## 322 DISCUSSION

323 The results of the current study are the first to characterize a role for coronin 1a in  
324 regulating the function of human M cells in a primary human intestinal epithelial model (i.e.  
325 enteroids). Moreover, we demonstrate in this model that human M cells functionally respond to  
326 luminal signals that induce transcytosis of luminal gut cargo. We show that enteric pathogens,  
327 including EPEC, AIEC, and rotavirus, but not commensal bacteria, are sufficient to stimulate M  
328 cell-mediated uptake and transcytosis of luminal contents. In the case of EPEC, we show that  
329 either intact or sonicated EPEC can initiate an M cell response, but this effect does not involve  
330 TLR4 as LPS does not mimic the same effect. In order to understand what M cell related protein  
331 is responsible for this pathogen-induced stimulation of M cell function, we revealed a unique  
332 regulatory role for coronin 1a. In HEMs enriched for M cells, coronin 1a demonstrates a high  
333 correlation of expression with Gp-2<sup>+ve</sup> mature M cells. Using coronin 1a KD HEMs, we  
334 discovered that EPEC induction of M cell activity was lost. This finding was associated with  
335 decreased abundance of Gp-2<sup>+ve</sup> in M cells; although, expression of the M cell transcription  
336 factors, SOX8 and Spi-B, were unaffected.

337 To better understand the mechanisms that govern human M cell function, we employed  
338 the use of human enteroids derived from the ileum of healthy donors. Human enteroids are  
339 differentiated to express M cells by reducing Wnt signaling and stimulating non-canonical NF-κB  
340 signaling by exposing enteroids to receptor activator of NF-κB ligand (RANKL)<sup>11,16,18,19,29</sup>.  
341 Recent reports have shown that in addition to RANKL, stimulation of canonical TNFR-mediated  
342 NF-κB signaling results in increased numbers of M cells in human enteroids that better mimics  
343 their abundance *in vivo*<sup>11,16,20</sup>. This additive activation of NF-κB signaling has been shown to  
344 significantly enhance the expression of M cell associated genes in mice<sup>19</sup> but without affecting  
345 the number of Gp-2<sup>+ve</sup> M cells *in vivo* and in murine enteroids. For the current study, we  
346 differentiated (no Wnt3a, no R-spondin-1; 100ng/ml RANKL, 50ng/ml TNF-α) human ileal  
347 enteroid monolayers to express M cells and demonstrate that both TNF-α and RANKL induce a

348 significantly higher number of M cells compared to RANKL alone. This finding is supported by a  
349 recent report showing similar effects in human enteroids following exposure to RANKL, retinoic  
350 acid, and lymphotoxin suggesting that concomitant suppression of Wnt signaling and NF- $\kappa$ B  
351 activation converging at RelB enhances M cell expression in HIEs <sup>11</sup>. To further support the  
352 relevance of human M cell expressing HEMs, we show that M cell abundance is highest in ileal  
353 enteroids compared to those from the duodenum or jejunum. Since Peyer's patches are more  
354 prevalent in the distal small intestine, our data supports previous findings that HIEs can  
355 recapitulate the phenotype of the intestinal segment from which they were derived <sup>25</sup>.

356         Coronin 1a plays a role in phagocytosis of pathogenic bacteria by antigen presenting  
357 immune cells <sup>34</sup>. To date, a role for coronin 1a in human epithelial cells has not been described  
358 since studies designed to interrogate an epithelial-specific role for coronin 1a have not been  
359 performed. Our data are the first to identify that coronin 1a is expressed in primary human  
360 intestinal epithelial cells modeled to mimic the follicle associated epithelium (FAE) of the Peyer's  
361 patch. While RANKL induced some increased expression of coronin 1a in HEMs, this  
362 expression was greatly enhanced when both TNF- $\alpha$  and RANKL were added to induce M cell  
363 differentiation. This enhanced coronin 1a expression was also reported in a recent report from  
364 Ding et al. <sup>11</sup> which found similar upregulation of coronin 1a by RNAseq in human ileal enteroids  
365 differentiated with RANKL, retinoic acid, and lymphotoxin. These data, together with ours,  
366 suggest that stimulation of canonical and non-canonical NF- $\kappa$ B signaling is sufficient to increase  
367 coronin 1a in human enteroids expressing M cells. Considering that the FAE only comprises a  
368 fraction of the entire intestinal epithelium could explain how epithelial expression of coronin 1a  
369 could be overlooked. Interestingly, analysis of large data sets of murine Peyer's patches or  
370 murine enteroids differentiated to express M cells did not reveal enhanced expression of coronin  
371 1a. Whether coronin 1a plays a similar role in regulating M cell function in the murine FAE  
372 remains to be determined and would be important to reveal whether regulation of M cell activity  
373 in humans and mice differ. Additionally, since M cells are present in other mucosal surfaces,

374 including the lung and nasal epithelium, further studies investigating a role for coronin 1a in  
375 these tissues would also be of interest.

376 While our findings strongly suggest that lineage differentiation of human M cells is  
377 sufficient to express coronin 1a, which is necessary to mediate luminal responses and facilitate  
378 M cell function, other factors within the Peyer's patch are known to influence M cell activity.  
379 Evidence in mouse studies show that stromal and immune cell derived factors, such as 4-1BB  
380 and S100A4, from the sub-epithelial dome (i.e. stromal cells immediately below the FAE) can  
381 enhance M cell function without affecting the number of M cells<sup>30,42</sup>. Whether these factors have  
382 the same effects on human M cells remains to be determined. In addition to receiving signals,  
383 intestinal epithelial cells secrete cytokines/chemokines that instruct immune responses to  
384 infections. Similarly, M cells associate with a sub-type of intestinal macrophages and dendritic  
385 cells that are phenotypically distinct from the same monocyte-derived immune cells present in  
386 intestinal villi immediately adjacent to the PP<sup>43</sup>. These findings suggest that factors from other  
387 stromal cells, which are not present in our current M cell expressing HEMs, may influence M cell  
388 function. Whether coronin 1a maintains a similar regulatory role in the presence of other stromal  
389 regulatory factors is yet unknown. Since co-cultures of human enteroids with stromal,  
390 endothelial, and immune cells have already been established<sup>14,44,45</sup>, future studies using these  
391 more complex in vitro cultures could provide additional insight in human M cell function.

392 Our results demonstrate the requirement for coronin 1a in regulating M cell function  
393 during infection with pathogenic microbes; however, the signaling mechanisms initiated by  
394 pathogenic bacteria that lead to activation of coronin 1a remain to be studied in human M cells.  
395 Coronin 1a activity is regulated by Ser/Thr phosphorylation by PKC<sup>46</sup>, which is also associated  
396 with elevation of intracellular calcium<sup>47</sup>. Whether AIEC, EPEC, and RV, similarly or  
397 differentially affect the expression and/or activation of coronin 1a in human M cells requires  
398 deeper investigation and is beyond the scope of the current study. In addition to  
399 phosphorylation, our data demonstrate that coronin 1a is critical for M cell-mediated antigen

400 uptake and transcytosis in response to an enteric pathogen. It is unclear what mechanism  
401 explains this loss of uptake and transcytosis in human M cells when coronin 1a expression is  
402 reduced. A role for coronin 1a in the anchoring, retention, or trafficking of apical proteins  
403 remains to be investigated, particularly in human M cells. Considering our data showing that Gp-  
404 2 expression is significantly diminished in coronin 1a KD HEMs, it is reasonable to hypothesize  
405 that coronin 1a may stabilize the apical expression of PRRs in M cells. Future studies to  
406 investigate whether coronin 1a affects other PRRs such as  $\beta$ 1-integrin (binds *Yersinia*  
407 *pseudotuberculosis*<sup>48</sup>) and dectin-1 (binds secretory IgA<sup>49</sup> and fungal  $\beta$ -glucan<sup>50</sup>) in our human  
408 M cell HEMs would provide more insight into the regulation of human M cell function by coronin  
409 1a.

410 Our studies are the first to demonstrate that human M cell expressing enteroids respond  
411 to signals from luminal pathogenic microbes to induce phagocytic uptake and transcytosis of gut  
412 cargo by a unique coronin 1a dependent mechanism. The results of these current study will  
413 improve our understanding how human M cells function for future development of novel  
414 therapeutic strategies to treat GI disorders, such as Crohn's disease, or even possibly  
415 development of new strategies to enhance oral vaccine delivery.

416

#### 417 **Acknowledgments**

418 The authors wish to thank Dr. Alfredo Torres (University of Texas Medical Branch) for providing  
419 the AIEC strain NRG857c (O83:H1). The authors also acknowledge the Integrated Physiology  
420 and Imaging Cores of the Hopkins Conte Digestive Disease Basic and Translational Research  
421 Core Center. This project was funded by NIH/NIAID P01-AI125181 and NIH/NIDDK P30-  
422 DK089502.

423

424

425



426

427

428

429

430

431

432

433

#### 434 **FIGURE LEGENDS**

435 **Figure 1: Induction of M cells in human enteroid monolayers. A-C)** – Immunofluorescent  
436 confocal microscopy demonstrating the expression of Gp-2<sup>+ve</sup> M cells (red) in ileal enteroid  
437 monolayers from four separate donors following differentiation in the presence or absence of  
438 RANKL and/or TNF- $\alpha$ . white=actin. **A** and **B** size bars = 50  $\mu$ m. **C)** – Gp-2 expression was  
439 localized to the apical membrane of M cells HEMs. Red=Gp-2; white=actin; blue=nuclei. Size  
440 bar = 20  $\mu$ m **D)** - Scanning electron microscopy of human ileal monolayers differentiated to  
441 express M cells. n=3. Size bar = 1.0  $\mu$ m **E)** – M cells abundance is highest in ileal enteroid  
442 monolayers differentiated with RANKL and TNF- $\alpha$  compared to duodenal (Duod) and jejunal  
443 enteroid monolayers. M cell numbers were quantitated from at least 10 ROIs (regions of  
444 interest). Results are mean  $\pm$  SE from 3 independent experiments. \*p<0.05. **F)** - Confocal  
445 microscopy shows CCL23 (green) in cells that lack Gp-2 (red) suggesting that M cell enteroids  
446 also express FAE markers. Blue = nuclei; white = actin. Size bars = 50 $\mu$ m

447

448 **Figure 2: Luminal capture of fluorescent beads in human ileal M cell expressing**  
449 **monolayers is stimulated by EPEC or AIEC, not commensal bacteria, a process that does**  
450 **not involve LPS. A)** Immunofluorescence confocal microscopy of M cell expressing enteroid  
451 monolayers exposed to 2.0 $\mu$ m fluorescent polystyrene latex beads (red). Beads were only  
452 detected in Gp-2 (magenta) expressing M cells. **B)** Fluorescent beads (2.0 $\mu$ m) were added  
453 apically to human enteroid monolayers and exposed to vehicle (CTL), LPS, intact EPEC, or  
454 sonicated EPEC (EPEC lys). Monolayers were lysed and the number of internalized beads was  
455 measured in lysates using a fluorescent plate reader. **C)** Fluorescent beads (0.02 $\mu$ m) were  
456 added apically to human monolayers and exposed to vehicle (CTL), the commensal bacteria,  
457 HS, or EPEC. Basolateral media was collected and fluorescence intensity of beads measured  
458 on a plate reader. Results are mean  $\pm$  SE from 3 independent experiments. \*p<0.05. **D)**  
459 Immunofluorescence confocal microscopy of M cell HEMs either mock infected (Control) or  
460 exposed to AIEC (Strain 857c, 10<sup>6</sup> CFUs for 16h). Approximately 4x10<sup>8</sup> fluorescent polystyrene  
461 latex beads (red) was added apically with or without AIEC to visualize uptake by M cells, labeled  
462 with anti-Gp-2 antibody (white). Blue = nuclei. **E)** AIEC-induced uptake of fluorescent beads was  
463 quantified in human M cells. In DF and uninfected (CTL) M cell HEMs, fluorescent beads were  
464 observed only on the apical (luminal) surface. Following AIEC exposure, M cell HEMs  
465 internalized all fluorescent beads. Results are mean  $\pm$  SE from 3 independent experiments.  
466 \*p<0.05. **F)** Transcytosis of human rotavirus (RV) requires M cells. Human RV strain, Ito, was  
467 exposed apically (24h) to DF or M cell enteroid monolayers. Infectious virus was quantified from

468 basolateral media by plaque assay. pfu = plaque forming units. Results are mean  $\pm$  SE from 3  
469 experiments. \* $p < 0.01$

470  
471 **Figure 3: Coronin 1a expression highly correlates with Gp-2 expressing M cells. A)** M cell  
472 differentiation with RANKL + TNF- $\alpha$  induced the highest expression of coronin 1a. **B)** Coronin  
473 1a (green) and Gp-2 (red) co-localize in M cell enteroid monolayers. Asterisks (white) indicate  
474 co-expressing cells. Size bars = 20  $\mu\text{m}$  **C)** Pearson's correlation analysis for co-localization of  
475 coronin 1a and Gp-2 demonstrated a near perfect correlation between M cells and coronin 1a  
476 while **(D)** only ~30% of coronin 1a expressing cells were also positive for Gp-2. Data are  
477 correlation coefficients from  $n=3$  separate enteroid lines. **E)** M cell differentiation with RANKL +  
478 TNF- $\alpha$  induced the highest expression of coronin 1a. **F)** Confocal microscopy of HEMs  
479 expressing coronin 1a (green) and Gp-2 (red). XZ projections show apical Gp-2 with coronin 1a  
480 at the apical domain of the epithelium and partial co-localization (arrowheads) with actin (white)  
481 at the lateral membrane.  $N=3$  separate enteroid lines. Size bar = 20  $\mu\text{m}$ .

482  
483 **Figure 4: Luminal capture and transcytosis by M cell expressing human ileal enteroid**  
484 **monolayers requires coronin 1a. A-B)** Western blots of HIEs transduced with coronin 1a  
485 shRNA lentiviruses. The #59 construct has most reduced coronin 1a expression compared to  
486 non-silencing (NS) and non-transduced wild type controls (data not shown). **C)** Coronin 1  
487 knockdown (KD-B) prevented EPEC mediated luminal uptake of fluorescent beads. Basolateral  
488 media was collected and fluorescence measured on a plate reader. Results are mean  $\pm$  SE  
489 from 3 independent experiments. \* $p < 0.01$ .

490  
491 **Figure 5: Coronin 1a is necessary for the expression of mature M cells in human ileal**  
492 **enteroid monolayers. A)** Human ileal M cell monolayers expressing (NS control) or lacking  
493 (KD) coronin 1a were differentiated to express M cells and stained for expression of Gp-2 (red).  
494 Size bar = 50  $\mu\text{m}$  **B)** Coronin 1a KD (sh-B) resulted in significant decrease in the number of Gp-  
495 2<sup>+ve</sup> M cells when compared to non-silencing controls (NS) from the same patient line (HIE-2)  
496 and a separate normal, ileal enteroid monolayer (HIE-1). Results are mean  $\pm$  SE from 3  
497 independent experiments. \* $p < 0.01$ . **C-D)** Ileal HEMs were differentiated with RANKL+TNF- $\alpha$  to  
498 express M cells in coronin NS (non-silencing) and KD lines. Decreased coronin 1a expression  
499 did not affect mRNA expression of transcription factors, SOX8 or Spi-B. Data are mean  $\pm$  SE  
500 from  $n=3$  independent experiments. All results were not statistically different.

501  
502

503  
504

505

506

507

508

509

510

511

512

513

514  
515  
516  
517  
518  
519  
520  
521  
522  
523  
524  
525  
526  
527  
528  
529  
530  
531  
532  
533  
534  
535  
536  
537  
538  
539  
540  
541  
542  
543  
544  
545  
546  
547  
548  
549  
550  
551  
552  
553  
554  
555  
556  
557  
558  
559  
560  
561  
562  
563  
564

## REFERENCES

1. Neutra MR, Pringault E, Kraehenbuhl JP. Antigen sampling across epithelial barriers and induction of mucosal immune responses. *Annual Reviews Immunology*. 1996; 14: 275-300
2. Neutra MR, Frey A, Kraehenbuhl JP. Epithelial M cells: gateways for mucosal infection and immunization. *Cell*. 1996; 86: 345-348.
3. Lo DD. Vigilance or Subversion? Constitutive and inducible M cells in mucosal tissues. *Trends Immunol*. 2018; 39: 185-195.
4. Owen RL, Apple RT, Bhalla DK. Morphometric and cytochemical analysis of lysosomes in rat Peyer's patch follicle epithelium: their reduction in volume fraction and acid phosphatase content in M cells compared to adjacent enterocytes. *Anat Rec*. 1986; 216: 521-527.
5. Savidge TC, Smith MW, James PS, and Aldred P. Salmonella-induced M-cell formation in germ-free mouse Peyer's patch tissue. *American Journal of Pathology*. 1991; 139: 177-184.
6. Smith MW, James PS, Tivey DR. M cell numbers increase after transfer of SPF mice to a normal animal house environment. *American Journal of Pathology* 1987; 128: 385-389.
7. Cuvelier CA, Quatacker J, Mielants H, De Vos M, Veys E, Roels HJ. M-cells are damaged and increased in number in inflamed human ileal mucosa. *Histopathology*. 1994; 24: 417-426.
8. Gebert A, Steinmetz I, Fassbender S, Wendlandt KH. Antigen transport into Peyer's patches: increased uptake by constant numbers of M cells. *Am J Pathol*. 2004; 164: 65-72.
9. Borghesi C, Regoli M, Bertelli E, Nicoletti C. Modifications of the follicle associated epithelium by short-term exposure to a non-intestinal bacterium. *Journal of Pathology*. 1996; 180: 326-332.
10. Kerneis S, Bogdanova A, Kraehenbuhl JP. Conversion by Peyer's patch lymphocytes of human enterocytes into M cells that transport bacteria. *Science*. 1997; 277: 949-952.
11. Ding S, Song Y, Brulois KF, Pan J, Co JY, Ren L, Feng N, Yasukawa LL, Sanchez-Tacuba L, Wosen JE, Mellins ED, Monack DM, Amieva MR, Kuo CJ, Butcher EC, Greenberg HB. Retinoic acid and lymphotoxin signaling promote differentiation of human intestinal M cells. *Gastroenterology*. 2020; S0016-5085(20)30407-8.
12. Ranganathan S, Doucet M, Grassel CL, Delaine-Elias B, Zachos NC, Barry EM. Evaluating *Shigella flexneri* pathogenesis in the human enteroid model. *Infection and Immunity*. 2019; 87: e00740-18.

- 565 13. Sato T, Stange DE, Ferrante M, Vries RG, Van Es JH, Van den Brink S, Van Houdt WJ,  
566 Pronk A, Van Gorp J, Siersema PD, Clevers H. Long-term expansion of epithelial  
567 organoids from human colon, adenoma, adenocarcinoma, and Barrett's epithelium.  
568 *Gastroenterology*. 2011 Nov;141(5):1762-72.
- 569 14. Noel GN, Baetz NW, Staab JF, Donowitz M, Kovbasnjuk O, Pasetti M, Zachos NC. A  
570 primary human macrophage-enteroid co-culture model to investigate mucosal gut  
571 physiology and host-pathogen interactions. *Nature Scientific Reports*. 2017; 7: 45270.
- 572 15. Staab JF, Lemme-Dumit JM, Latanich R, Pasetti MF\*, Zachos NC\*. Co-culture system of  
573 human enteroids/colonoids with innate immune cells (i.e. macrophages and neutrophils).  
574 *Current Protocols in Immunology*. 2020. *In Press*.
- 575 16. Fasciano AC, Blutt SE, Estes MK, Mescas J. Induced differentiation of M cell-like cells in  
576 human stem cell-derived ileal enteroid monolayers. *Journal of Visualized Experiments*.  
577 2019; 26: 10.3791/59894.
- 578 17. Heijmans J, van Lidth de Jeude JF, Koo BK, Rosekrans SL, Wielenga MC, van de  
579 Wetering M, Ferrante M, Lee AS, Onderwater JJ, Paton JC, Paton AW, Mommaas AM,  
580 Kodach LL, Hardwick JC, Hommes DW, Clevers H, Muncan V, van den Brink GR. ER  
581 stress causes rapid loss of intestinal epithelial stemness through activation of the  
582 unfolded protein response. *Cell Rep*. 2013 Apr 25;3(4):1128-39.
- 583 18. Rouch JD, Scott A, Lei NY, Solorzano-Vargas RS, Wang J, Hanson EM, Kobayashi M,  
584 Lewis M, Stelzner MG, Dunn JC, Eckmann L, Martín MG. Development of Functional  
585 Microfold (M) Cells from Intestinal Stem Cells in Primary Human Enteroids. *PLoS One*.  
586 2016 Jan 28;11(1):e0148216.
- 587 19. Wood MB, Rios D, Williams IR. TNF- $\alpha$  augments RANKL-dependent intestinal M cell  
588 differentiation in enteroid cultures. *Am J Physiol Cell Physiol*. 2016 Sep 1;311(3):C498-  
589 507.
- 590 20. Haley PJ. Species differences in the structure and function of the immune system.  
591 *Toxicology*. 2003; 188: 49-47.
- 592 21. Terahara K Yoshida M, Igarashi O, Nochi T, Pontes GS, Hase K, Ohno H, Kurokawa S,  
593 Mejima M, Takayama N, Yuki Y, Lowe AW, Kiyono H. Comprehensive gene expression  
594 profiling of Peyer's patch M cells, villous M-like cells, and intestinal epithelial cells. *J*  
595 *Immunol*. 2008; 180: 7840–7846.
- 596 22. Hase K, Kawano K, Nochi T, Pontes GS, Fukuda S, Ebisawa M, Kadokura M, Tobe T,  
597 Fujimura Y, Kawano S, Yabashi A, Waguri S, Nakato G, Kimura S, Murakami T, Imura  
598 M, Hamura K, Fukuoka SI, Lowe AW, Itoh K, Kiyono H, Ohno H. Uptake through  
599 glycoprotein 2 of FimH<sup>+</sup> bacteria by M cells initiates mucosal immune  
600 responses. *Nature* 2009; 462: 226–231.
- 601 23. Owen RL, Bhalla DK. Cytochemical analysis of alkaline phosphatase and esterase  
602 activities and of lectin-binding and anionic sites in rat and mouse Peyer's patch M cells.  
603 *American Journal of Anatomy* 1983; 168: 199–212.
- 604 24. Bye WA, Allan CH, Trier JS. Structure distribution and origin of M cells in Peyer's  
605 patches of mouse ileum. *Gastroenterology* 1984; 86: 789–801.
- 606 25. Middendorp S, Schneeberger K, Wiegerinck CL, Mokry M, Akkerman RD, van  
607 Wijngaarden S, et al. Adult stem cells in the small intestine are intrinsically programmed  
608 with their location-specific function. *Stem Cells*. 2014;32(5):1083-91.
- 609 26. Anderle P, Rumbo M, Siero F, Mansourian R, Michetti P, Roberts MA, Kraehenbuhl P.  
610 Novel markers of the human follicle-associated epithelium identified by genomic profiling  
611 and microdissection. *Gastroenterology*. 2005; 129: 321-327.
- 612 27. Gebert A, Steinmetz I, Fassbender S, Wendlandt KH (2004) Antigen transport into  
613 Peyer's patches: increased uptake by constant numbers of M cells. *American Journal of*  
614 *Pathology* 2004; 164: 65–72.

- 615 28. Kucharzik T, Lugering N, Rautenberg K, Lugering A, Schmidt MA, Stoll R, Domschke W.  
616 Role of M cells in intestinal barrier function. *Annals of the New York Academy of*  
617 *Sciences* 2000; 915: 171–183.
- 618 29. de Lau W, Kujala P, Schneeberger K, Middendorp S, Li VS, Barker N, Martens A,  
619 Hofhuis F, DeKoter RP, Peters PJ, Nieuwenhuis E, Clevers H. Peyer's patch M cells  
620 derived from Lgr5(+) stem cells require SpiB and are induced by RankL in cultured  
621 "miniguts". *Mol Cell Biol.* 2012; 32: 3639-47.
- 622 30. Hsieh EH, Fernandez X, Wang J, Hamer M, Calvillo S, Croft M, Kwon BS, Lo DD.  
623 CD137 is required for M cell functional maturation but not lineage commitment.  
624 *American Journal of Pathology.* 2010; 177: 666-676.
- 625 31. Rios D, Wood MB, Li J, Chassaing B, Gewirtz AT, Williams IR. Antigen sampling by  
626 intestinal M cells is the principal pathway initiating mucosal IgA production to commensal  
627 enteric bacteria. *Mucosal Immunology.* 2016; 9: 907–916.
- 628 32. Yamamoto T, Koyama Y, Matsumoto M, Sonoda E, Nakayama S, Uchimura M,  
629 Paveenkittiporn W, Tamura K, Yokota T, Echeverria P. Localized, Aggregative, and  
630 Diffuse Adherence to HeLa Cells, Plastic, and Human Small Intestines by Escherlchi coli  
631 Isolated from Patients with Diarrhea. *The Journal of Infectious Diseases* 1992; 166:  
632 1295-1310.
- 633 33. Saxena K, Blutt SE, Ettayebi K, Zeng X-L, Broughman JR, Crawford SE, Karandikar U,  
634 Sastri NP, Conner ME, Opekun A, Graham DY, Foulke-Abel J, In J, Kovbasnjuk O,  
635 Zachos NC, Donowitz M, Estes MK. Human intestinal enteroids: a new model to study  
636 human rotavirus infection, host restriction and pathophysiology. *Journal of Virology.*  
637 2015; 90: 43-56.
- 638 34. Jayachandran R, Sundaramurthy V, Combaluzier B, Mueller P, Korf H, Huygen K,  
639 Miyazaki T, Albrecht I, Massner J, Pieters J. Survival of mycobacteria in macrophages is  
640 mediated by coronin 1-dependent activation of calcineurin. *Cell.* 2007; 130: 37-50.
- 641 35. Zheng PY, Jones NL. Helicobacter pylori strains expressing the vacuolating cytotoxin  
642 interrupt phagosome maturation in macrophages by recruiting and retaining TACO  
643 (coronin 1) protein. *Cell Microbiology.* 2003; 5: 25-40.
- 644 36. Lu H, Clarke M. Dynamic properties of Legionella-containing phagosomes in  
645 Dictyostelium amoebae. *Cell Microbiology.* 2005; 7: 995-1007.
- 646 37. Knoop KA, Kumar N, Butler BR, Sakthivel SK, Taylor RT, Nochi T, Akiba H, Yagita H,  
647 Kiyono H, Williams IR. RANKL Is Necessary and Sufficient to Initiate Development of  
648 Antigen-Sampling M Cells in the Intestinal Epithelium. *Journal of Immunology.* 2009;  
649 183: 5738-5747.
- 650 38. Kimura S, Kobayashi N, Nakamura Y, Kanaya T, Takahashi D, Fujiki R, Mutoh M, Obata  
651 Y, Iwanaga T, Nakagawa T, Kato N, Sato S, Kaisho T, Ohno H, Hase K. Sox8 is  
652 essential for M cell maturation to accelerate IgA response at the early stage after  
653 weaning in mice. *Journal of Experimental Medicine.* 2019; 216: 831-846.
- 654 39. Kanaya T, Hase K, Takahashi D, Fukuda S, Hoshino K, Sasaki I, Hemmi H, Knoop KA,  
655 Kumar N, Sato M, Katsuno T, Yokosuka O, Toyooka K, Nakai K, Sakamoto A, Kitahara  
656 Y, Jinnohara T, McSorley SJ, Kaisho T, Williams IR, Ohno H. The Ets transcription factor  
657 Spi-B is essential for the differentiation of intestinal microfold cells. *Nature Immunology.*  
658 2012; 13: 729-736.
- 659 40. Sato S, Kaneto S, Shibata N, Takahashi Y, Okura H, Yuki Y, Kunisawa J, Kiyono H.  
660 Transcription factor Spi-B-dependent and -independent pathways for the development of  
661 Peyer's patch M cells. *Mucosal Immunology.* 2003; 6: 838–846
- 662 41. Nakamura Y, Kimura S, Hase K. M cell-dependent antigen uptake on follicle-associated  
663 epithelium for mucosal immune surveillance. *Inflammation and Regeneration.* 2018; 38:  
664 15.

- 665 42. Kunimura K, Sakata D, Tun X, Uruno T, Ushijima M, Katakai T, Shiraishi A, Aihara R,  
666 Kamikaseda Y, Matsubara K, Kanegane H, Sawa S, Eberl G, Ohga S, Yoshikai Y, Fukui  
667 Y. S100A4 protein is essential for the development of mature microfold cells in  
668 Peyer's patches. *Cell Reports*. 2019; 29: 2823-2834.
- 669 43. Da Silva C, Wagner C, Bonnardel J, Gorvel JP, Lelouard H. The  
670 Peyer's patch mononuclear phagocyte system at steady state and during Infection.  
671 *Frontiers Immunology*. 2017; 8: 1254.
- 672 44. Lei NY, Jabaji Z, Wang J, Joshi VS, Brinkley GJ, Khalil H, Wang F, Jaroszewicz A,  
673 Pellegrini M, Li L, Lewis M, Stelzner M, Dunn JC, Martín MG. Intestinal subepithelial  
674 myofibroblasts support the growth of intestinal epithelial stem cells. *PLoS One*. 2014 Jan  
675 6;9(1):e84651.
- 676 45. Kasendra M, Tovaglieri A, Sontheimer-Phelps A, Jalili-Firoozinezhad S, Bein A,  
677 Chalkiadaki A, Scholl W, Zhang C, Rickner H, Richmond CA, Li H, Breault DT, Ingber  
678 DE. Development of a primary human Small Intestine-on-a-Chip using biopsy-derived  
679 organoids. *Sci Rep*. 2018 Feb 13;8(1):2871.
- 680 46. Oku T, Nakano M, Kaneko Y, Ando Y, Kenmotsu H, Itoh S, Tsuiji M, Seyama Y,  
681 Toyoshima S, Tsuji T. Constitutive turnover of phosphorylation at Thr-412 of human  
682 p57/coronin-1 regulates the interaction with actin. *Journal of Biological Chemistry*. 2012;  
683 287: 42910-42920.
- 684 47. Mueller P, Massner J, Jayachandran R, Combaluzier B, Albrecht I, Gatfield J, Blum C, C  
685 eredig R, Rodewald HR, Rolink AG, Pieters J. Regulation of T cell survival through  
686 coronin-1-mediated generation of inositol 1,4,5-trisphosphate and calcium mobilization  
687 after T cell receptor triggering. *2008 Nature Immunology*. 9, 424–431.
- 688 48. Clark MA, Hirst BH, Jepson MA. M-cell surface beta1 integrin expression and invasion-  
689 mediated targeting of *Yersinia pseudotuberculosis* to mouse Peyer's patch M cells.  
690 *Infection and Immunity*. 1998; 66: 1237-1243.
- 691 49. Rochereau N, Drocourt D, Perouzel E, Pavot V, Redelinghuys P, Brown GD, Tiraby G,  
692 Roblin X, Verrier B, Genin C, Corthésy B, Paul S. Dectin-1 is essential for reverse  
693 transcytosis of glycosylated SIgA-antigen complexes by intestinal M cells. *PLoS Biol*.  
694 2013; 11: e1001658.
- 695 50. Plato A, Hardison SE, Brown GD. Pattern recognition receptors in antifungal immunity.  
696 *Semin Immunopathol*. 2015; 37: 97-106.  
697

# Figure 1

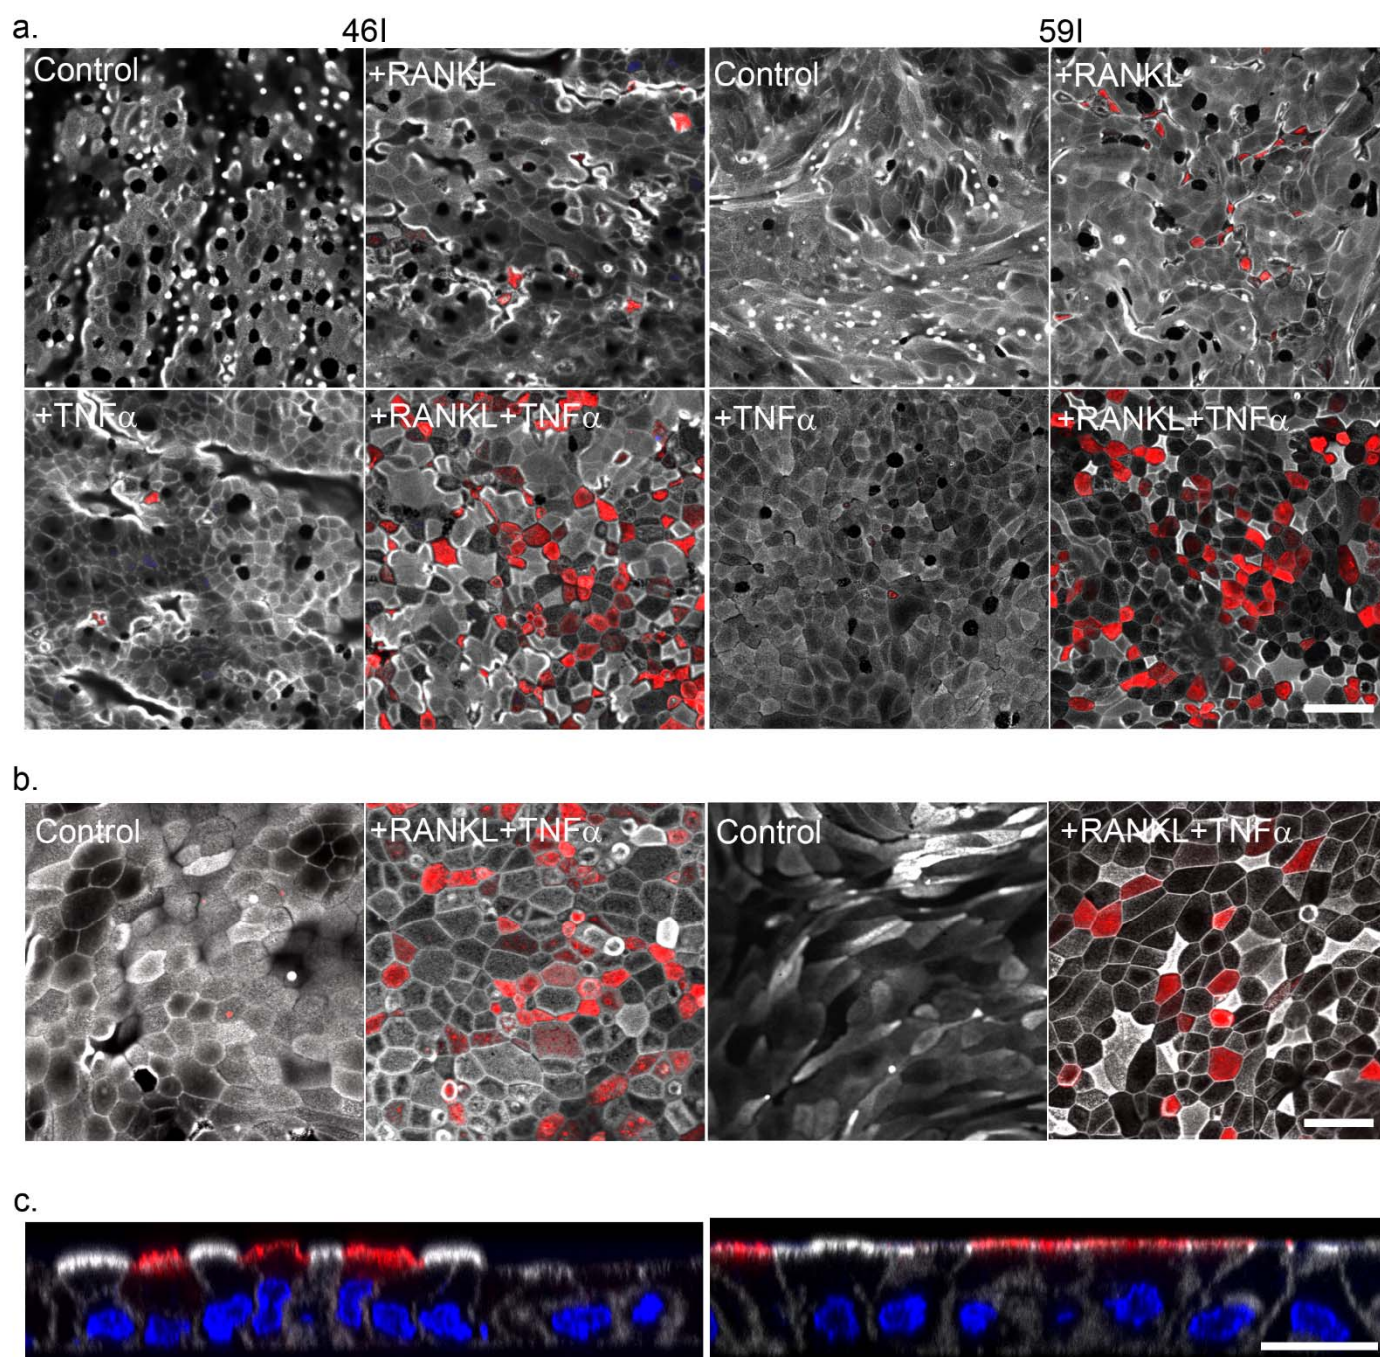

## Figure 1

d.

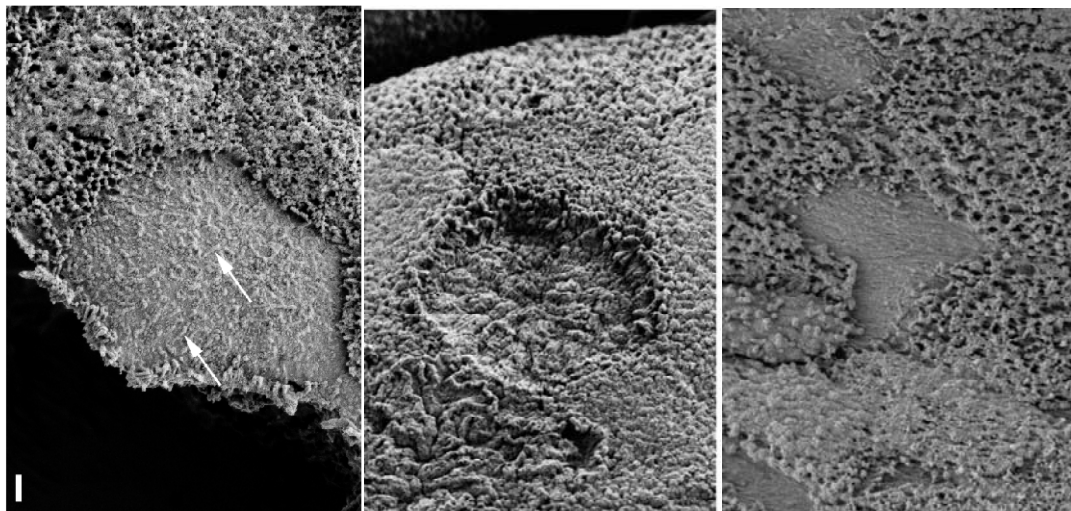

e.

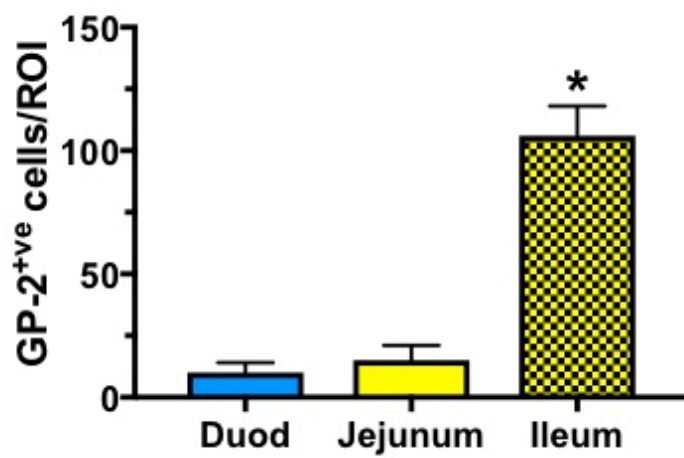

f.

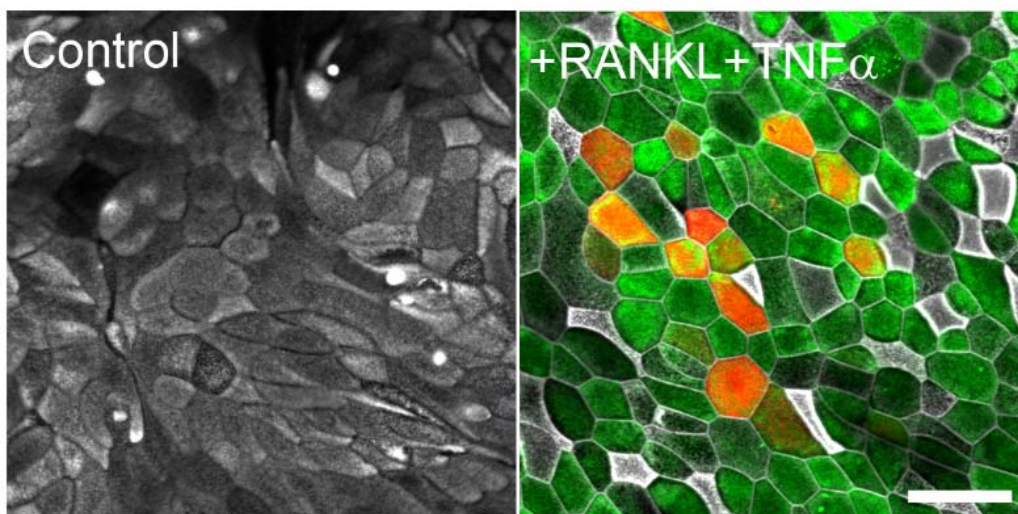



## Figure 2

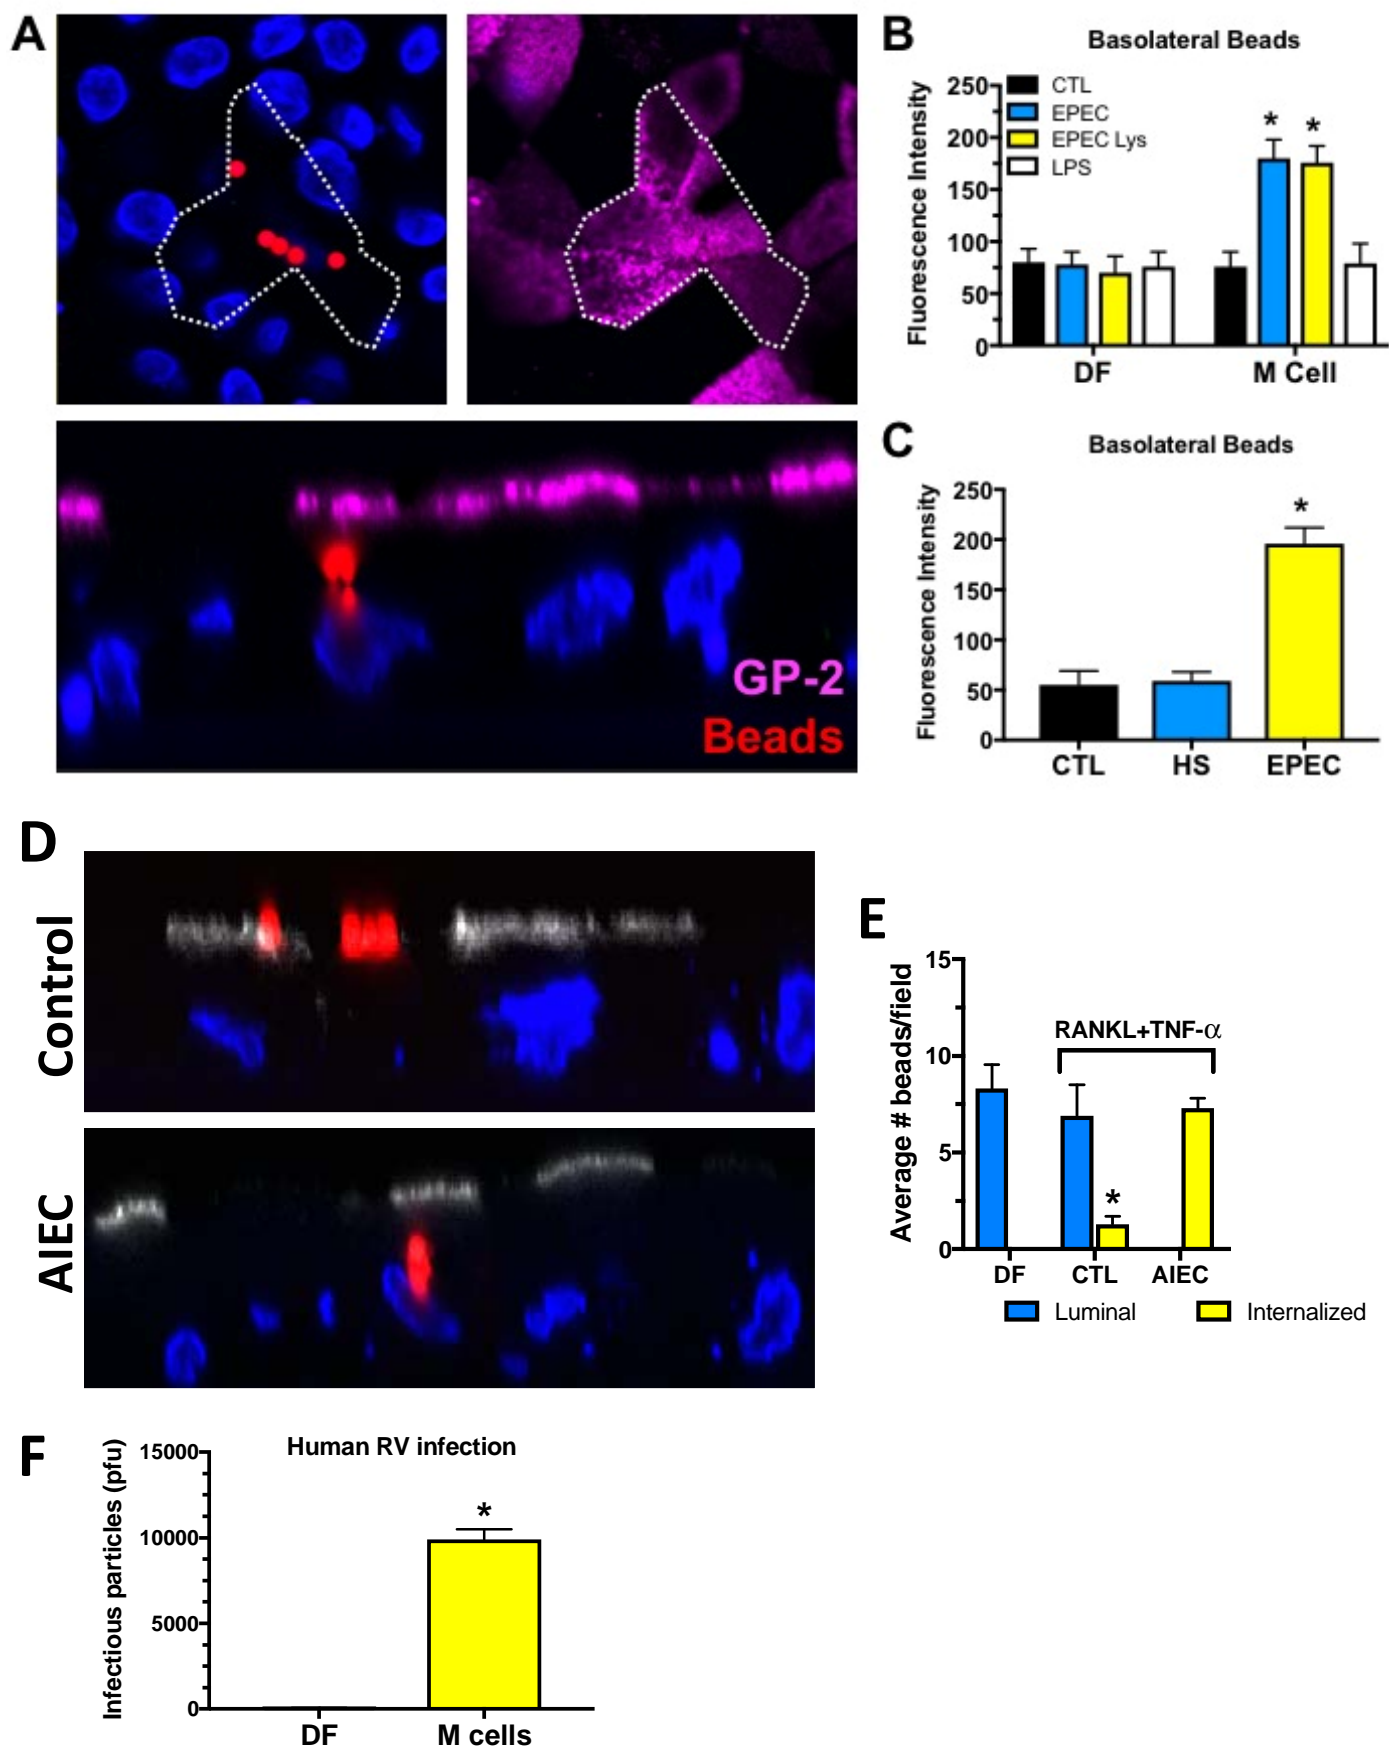

## Figure 3

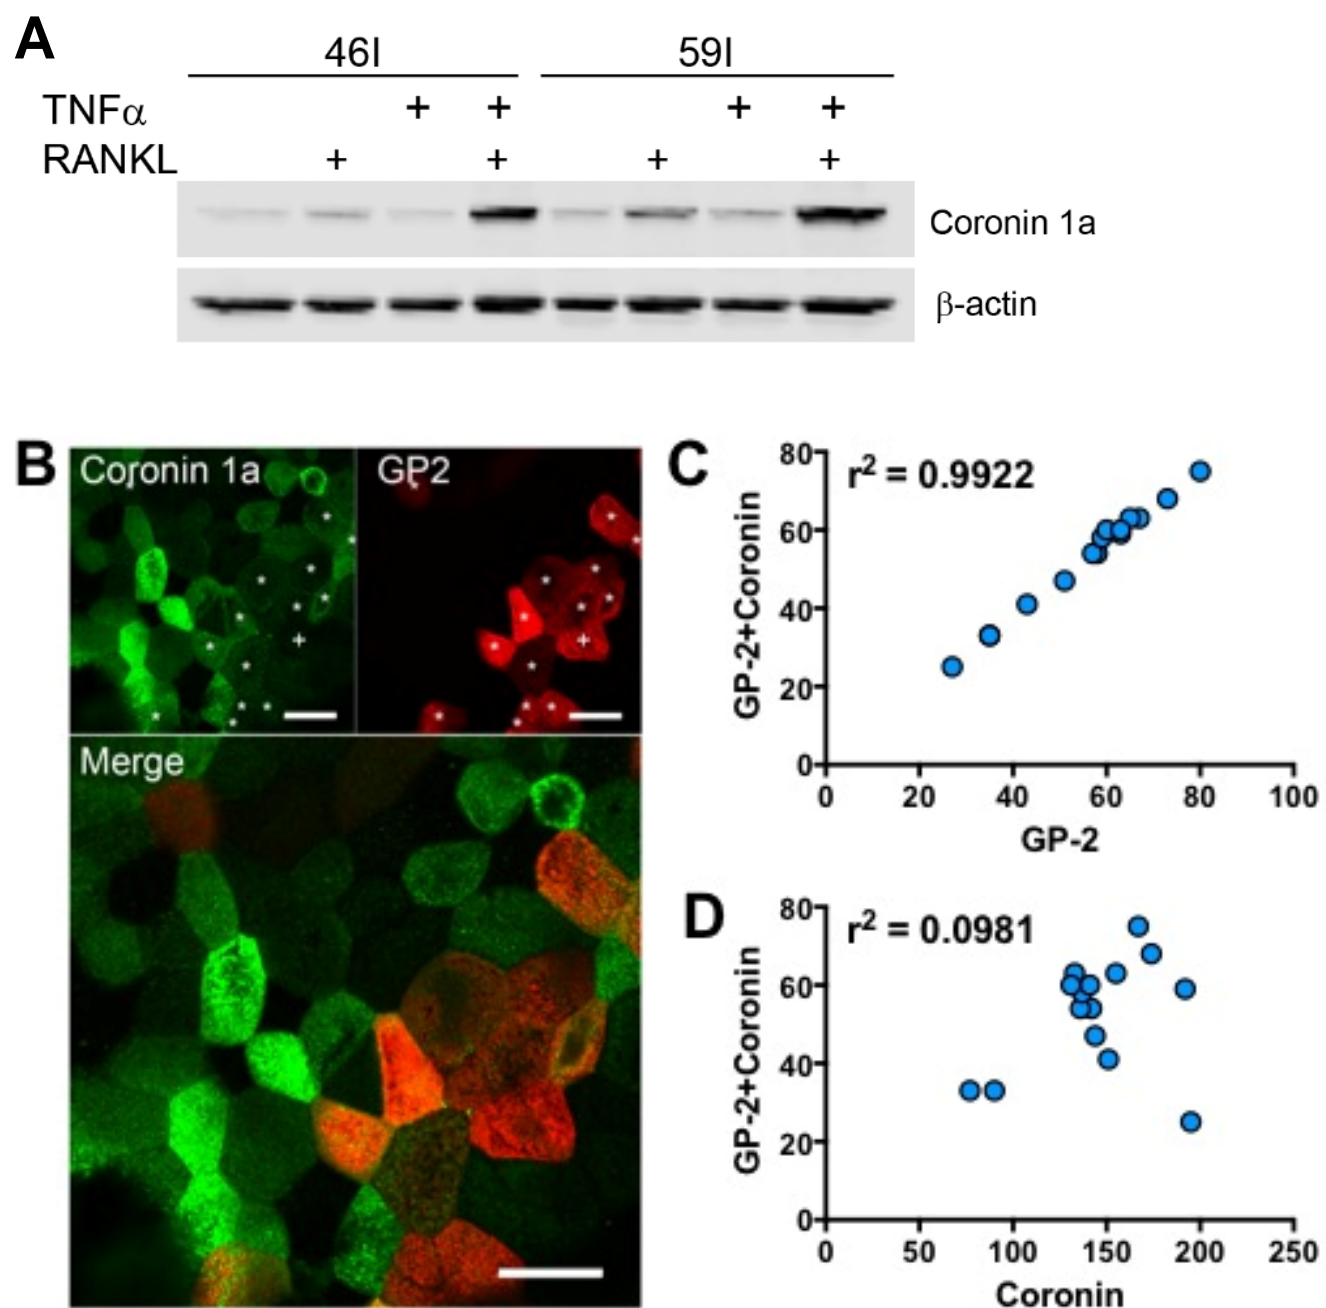

## Figure 3

**E**

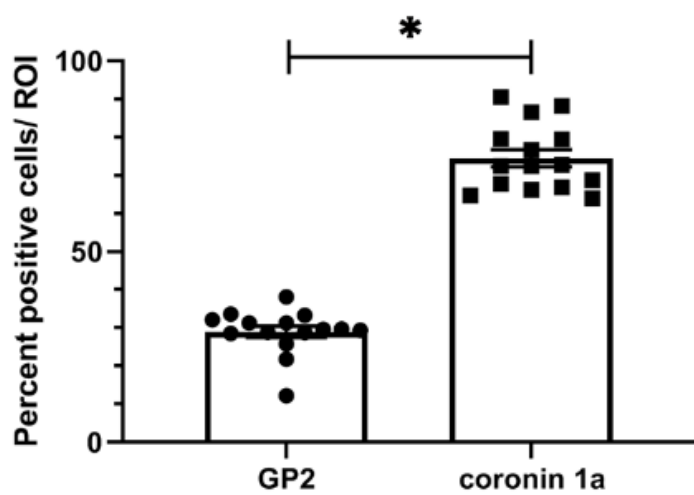

**F**

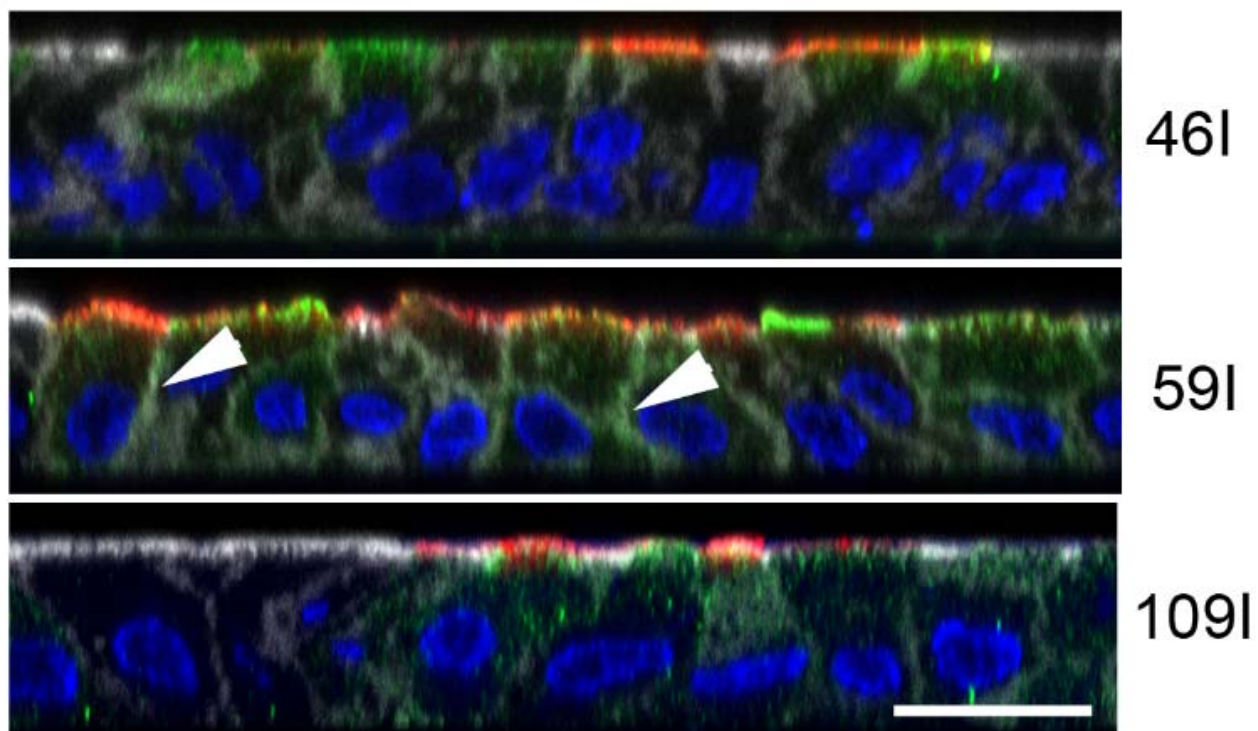

## Figure 4

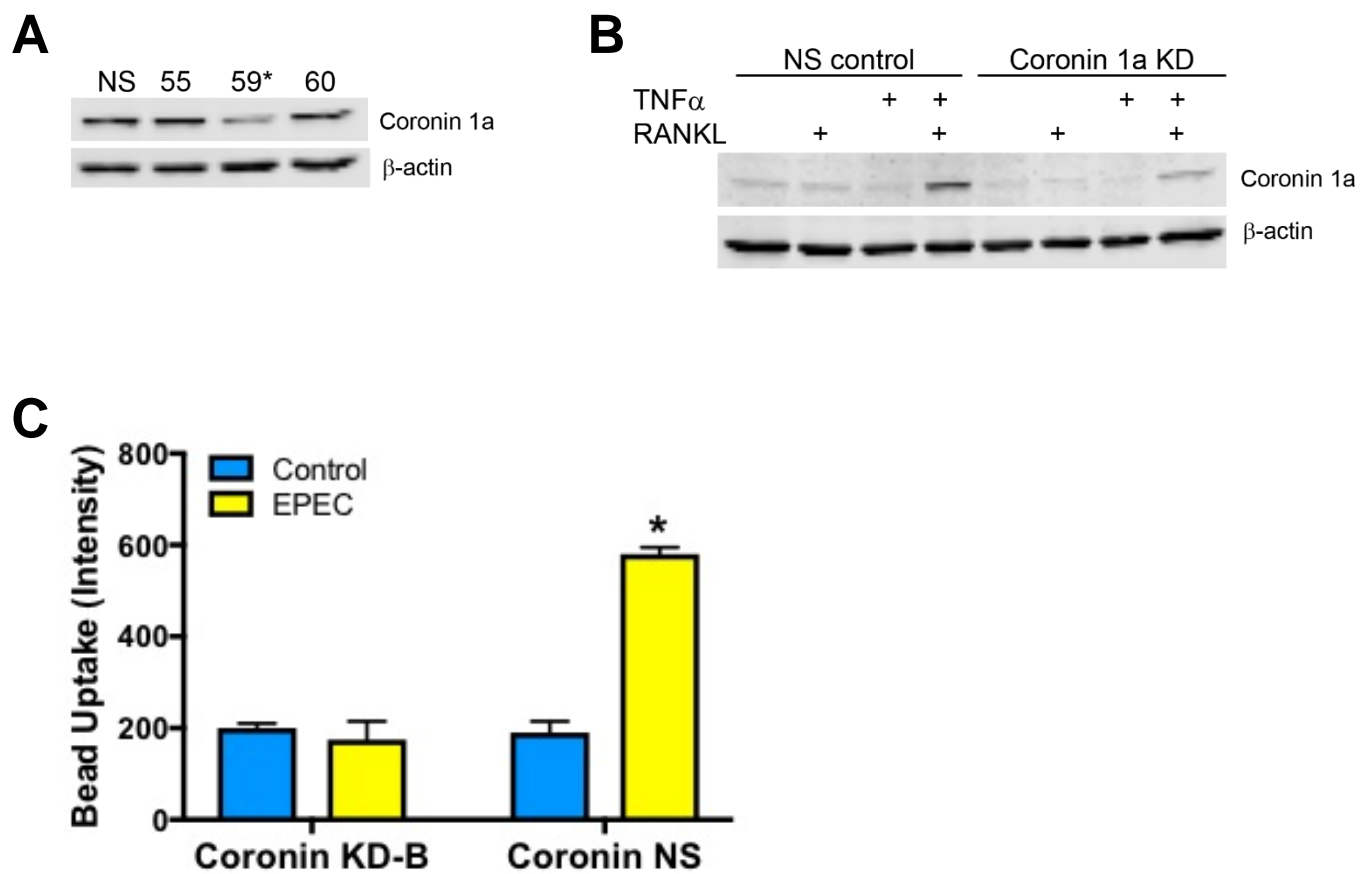

## Figure 5

**A**

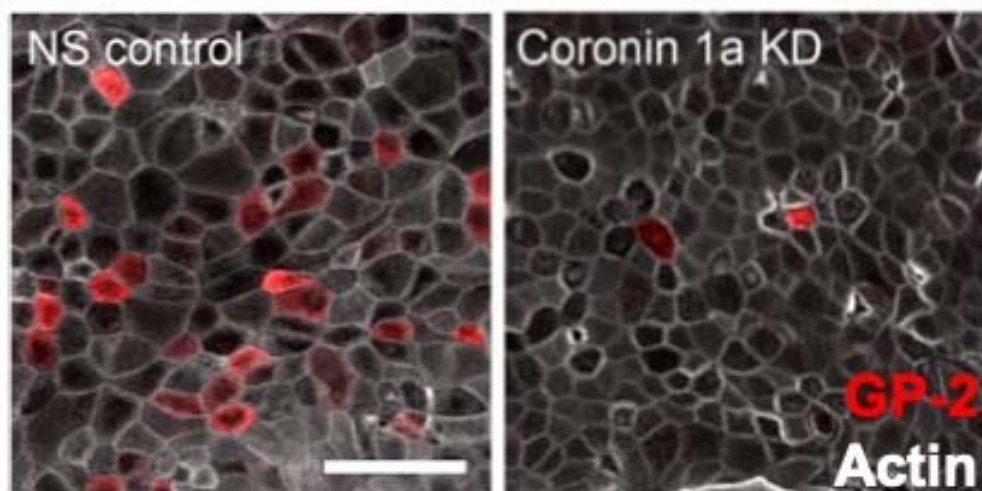

**B**

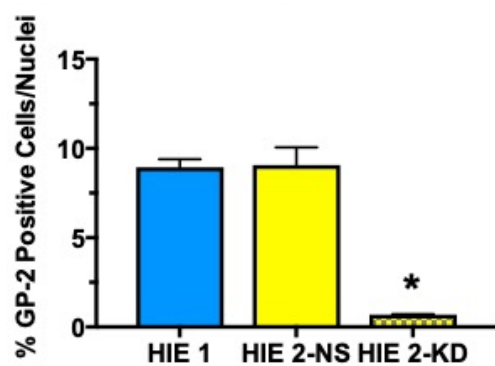

**C**

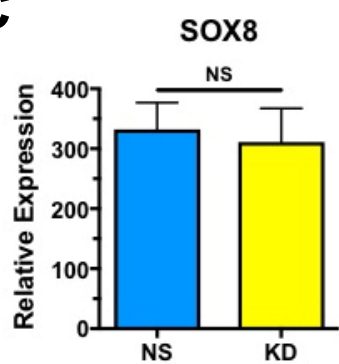

**D**

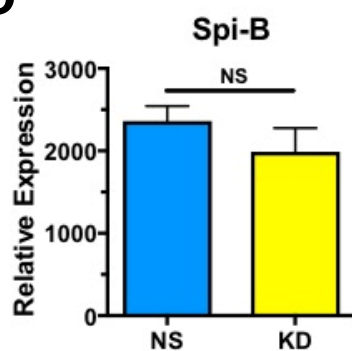

Source: http://biorxiv.org/content/10.1101/2020.10.12.305565v1.full.pdf
